# Supplementary material
Source: ML conference proceedings conference paper supplement (https://openaccess.thecvf.com/content/CVPR2024/html/Jeong_Multi-agent_Long-term_3D_CVPR_2024_paper.html)
Supplement: Supplementary file 2 [file Jeong_Multi-agent_Long-term_3D_CVPR_2024_supplemental.zip]

Archive with 3 entries (3 files):
- CVPR_2024_T2P_Supp.pdf
- Scene_example_huang_lane.gif
- Scene_example_jordan_hall.gif
