# Supplementary material
Source: ML conference proceedings conference paper supplement (https://openaccess.thecvf.com/content/CVPR2024/html/Jeong_Multi-agent_Long-term_3D_CVPR_2024_paper.html)

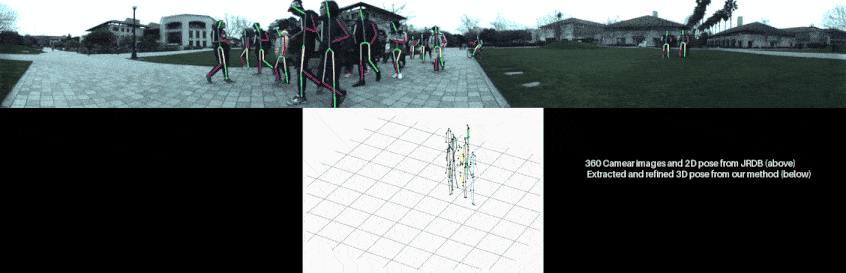

Supplement: Supplementary file 2 [file Jeong_Multi-agent_Long-term_3D_CVPR_2024_supplemental.zip › Scene_example_huang_lane.gif]

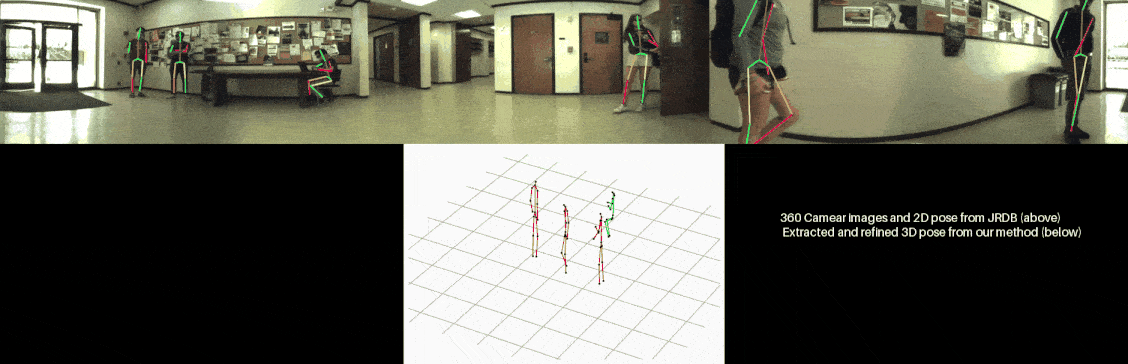

Supplement: Supplementary file 2 [file Jeong_Multi-agent_Long-term_3D_CVPR_2024_supplemental.zip › Scene_example_jordan_hall.gif]
